# Supplementary material for: Microphysics parameterization sensitivity of the WRF Model version 3.1.7 to extreme precipitation: evaluation of the 1997 New Year’s flood of California
Source: Copernicus journal article supplement (doi:10.5194/gmd-2016-94), 2016-06-21
Supplement: Supplementary file [file gmd-2016-94-AC1-supplement.pdf]

I would like to thank Anonymous Referee #1 for their time to evaluate my manuscript. Here is my replies, following Referee #1's concerns in bold-italics.

***“I feel the spatial and temporal scales are too small in the experiment design to judge different cloud microphysical schemes”.***

As I discussed in the summary and conclusion part of this manuscript, precipitation results can vary depending on the domain selection and it needs to be discussed in details to quantify the uncertainty added to the solutions by domain choice. Although domain selection is not a focus on this study, I understand your concern about experiment design. Therefore, I have run the model with a new and bigger domain, as you suggested, to prove that the final results does not change much and the current choice of nested domains are not too small. Although it is suggested that the domain grid numbers should not be less than 50x50 for each nested domains, some people even think this should be at least 100x100, according to my experience this choice really depends on the situation. Moreover, I had tried several different domain choices, not shown in this paper, and this domain was one of the optimum ones.

The new domain configuration (Big domain, hereafter) has been presented in Figure S.1. Its grid points are 121x107, 115x109, 112x106 for domains d01, d02, and d03, respectively. Outer most domain is d01 (black borders), the middle one is d02 (white borders), and the innermost domain is d03 (red borders). The runs took approximately 5 times longer than the runs of the domain presented in the manuscript (Small domain, hereafter).

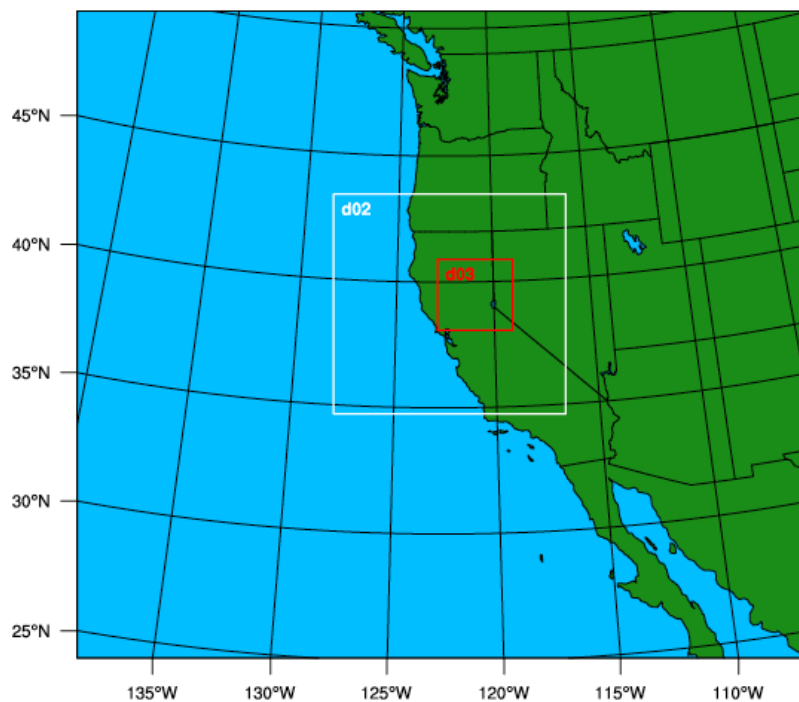

Figure S1. New domain setup (Big Domain)

The results of only MP1, MP2, MP3, MP4, MP5, MP6, MP7, MP8, and MP28 are given in the Table S.1. due to lack of time and they indicate that having bigger domain setup did not solve the problem that Cp values are still negative for CAP, HLH, HUR, LCN, OWC, and PIH stations. On the other hand, negative Cp values of MP1, MP2, MP4, MP6 for BTA stations are improved to positive Cp values in use of the big domain, as we might expect. PBIAS values of the big domain proves that bigger domain is not necessarily better than the smaller domain. As it is seen from the comparisons of ALP and BTA stations with 9 MP options of the WRF Model, PBIAS values are having more bias when the domain size increases, except MP28.

Table S. 1 Comparison of small and big domain with respect to 8 observation stations

| Cp Values    | ALP   |       | BTA   |       | CAP   |       | HLH   |       | HUR   |       | LCN      |          | OWC   |       | PIH   |       |
|--------------|-------|-------|-------|-------|-------|-------|-------|-------|-------|-------|----------|----------|-------|-------|-------|-------|
|              | Small | Big   | Small | Big   | Small | Big   | Small | Big   | Small | Big   | Small    | Big      | Small | Big   | Small | Big   |
| MP1          | 0.12  | 0.26  | -0.19 | 0.19  | -3.32 | -4.15 | -4.14 | -3.97 | -6.05 | -0.66 | -2369.21 | -2934.69 | -2.19 | -0.81 | -4.78 | -2.68 |
| MP2          | 0.05  | 0.37  | -0.13 | 0.3   | -2.66 | -2.49 | -5.48 | -5.21 | -5.82 | -3.81 | -2530.11 | -3304.35 | -2.28 | -0.83 | -4.89 | -2.81 |
| MP3          | 0.24  | 0.32  | 0.09  | 0.21  | -1.35 | -2.83 | -2.15 | -1.91 | -3.28 | -2.34 | -1490.32 | -1802.32 | -3.84 | -1.22 | -3.8  | -4.84 |
| MP4          | 0.04  | 0.22  | -0.15 | 0.16  | -1.51 | -2.02 | -2.05 | -2    | -4.72 | -4.16 | -1137.02 | -1577.65 | -6.62 | -2.54 | -5.57 | -5.43 |
| MP5          | 0.23  | 0.33  | 0.04  | 0.28  | -2.24 | -3.47 | -2.15 | -2.3  | -4.31 | -2.81 | -1078.18 | -1080.55 | -2.47 | -0.71 | -3.96 | -4.02 |
| MP6          | 0.07  | 0.27  | -0.11 | 0.16  | -2.5  | -3.24 | -3.06 | -3.01 | -3.68 | -3.4  | -1666.06 | -2146.91 | -3.34 | -1.82 | -4.06 | -3.18 |
| MP7          | 0.08  | 0.37  | 0     | 0.37  | -0.64 | -0.95 | -2.03 | -1.18 | -3.51 | -3.23 | -917.13  | -1117.38 | -3.09 | -1.07 | -3.33 | -3.32 |
| MP8          | 0.28  | 0.42  | 0.13  | 0.39  | -0.88 | -1.94 | -2.03 | -1.22 | -3.18 | -2.06 | -1061.81 | -1504.13 | -2.82 | -1.07 | -2.98 | -3.33 |
| MP9          | 0.26  | 0.05  | 0.34  | 0.05  | -1.53 | -2.05 | -2.78 | -2.7  | -1.49 | -1.94 | -1794.71 | -1821.73 | -1.56 | -2.34 | -3.22 | -4.61 |
| MP28         | 0.28  | 0.29  | 0.3   | 0.15  | -1.17 | -1.81 | -1.84 | -2.47 | -1.67 | -1.28 | -1822.81 | -1710.74 | -1.36 | -2.42 | -2.97 | -5.06 |
| <b>PBIAS</b> | ALP   |       | BTA   |       | CAP   |       | HLH   |       | HUR   |       | LCN      |          | OWC   |       | PIH   |       |
| Domain       | Small | Big   | Small | Big   | Small | Big   | Small | Big   | Small | Big   | Small    | Big      | Small | Big   | Small | Big   |
| MP1          | 28.7  | 68.3  | 20.9  | 52.2  | 130.4 | 174.2 | 91    | 131.4 | 74.9  | 20.8  | 12016.1  | 14213.5  | 20.8  | 32.6  | 129.1 | 140.9 |
| MP2          | 45.8  | 67.1  | 35    | 48.4  | 115   | 130.6 | 136.7 | 161.6 | 121.3 | 136.5 | 13139.5  | 15731.1  | 33.9  | 34.1  | 142   | 151.9 |
| MP3          | 4.6   | 54.8  | -1.3  | 39.4  | 102.2 | 158.7 | 78.5  | 93.2  | 96.5  | 97.6  | 10493.1  | 11991    | 40    | 25.9  | 129.1 | 185.8 |
| MP4          | 39.9  | 59.0  | 27.6  | 41.3  | 104.3 | 140.1 | 76.9  | 97.3  | 123.7 | 165.7 | 8905.1   | 10700.9  | 81.8  | 67.7  | 182.3 | 220.3 |
| MP5          | -22.5 | 22.0  | -19.9 | 24.5  | 136.6 | 186.3 | 78.9  | 90.7  | 99.3  | 97.8  | 8324     | 8974.2   | 16.3  | -4.6  | 138.2 | 190.3 |
| MP6          | 35.5  | 57.2  | 25    | 40.7  | 129   | 158.7 | 98.6  | 115.5 | 101.1 | 148.1 | 10525.1  | 12708.1  | 50.9  | 49.8  | 148.3 | 168   |
| MP7          | 51.3  | 43.9  | 38.8  | 30.2  | 69.9  | 110.6 | 58.7  | 73    | 96.9  | 132.4 | 7864.8   | 8863.5   | 58.7  | 42.4  | 156.5 | 174.5 |
| MP8          | 2.9   | 37.6  | -4.7  | 21.2  | 71.7  | 130.8 | 57.4  | 82.1  | 83.2  | 103.2 | 8016.9   | 10600.4  | 30.5  | 38.5  | 116.8 | 170.7 |
| MP9          | 63.2  | 75.1  | 48.3  | 58.4  | 135.4 | 130.4 | 129   | 112.7 | 64.5  | 42    | 11870.1  | 10621.3  | 65.6  | 55.4  | 192.9 | 210.8 |
| MP28         | 36.1  | 28.3  | 22.2  | 11.5  | 106.3 | 114.7 | 99    | 102.8 | 81.2  | 31.6  | 12189.8  | 11091.1  | 52.8  | 40.5  | 179.9 | 204.8 |
| <b>NRMSE</b> | ALP   |       | BTA   |       | CAP   |       | HLH   |       | HUR   |       | LCN      |          | OWC   |       | PIH   |       |
| Domain       | Small | Big   | Small | Big   | Small | Big   | Small | Big   | Small | Big   | Small    | Big      | Small | Big   | Small | Big   |
| MP1          | 117.1 | 107.5 | 131.3 | 108.2 | 218   | 238   | 165.5 | 162.7 | 235   | 114.2 | 6975     | 7762.6   | 126.3 | 95.1  | 217   | 173.1 |
| MP2          | 122.2 | 99.8  | 128.8 | 102.1 | 200.7 | 195.9 | 186.2 | 182.4 | 231.3 | 194.1 | 7211.6   | 8239.4   | 128.1 | 96    | 219.4 | 176.4 |
| MP3          | 109.1 | 102.9 | 114.6 | 107.6 | 160.8 | 205.3 | 129.7 | 125   | 183.2 | 161.7 | 5535.9   | 6085.2   | 155.5 | 105.5 | 198   | 218.8 |
| MP4          | 122.4 | 110.4 | 128.6 | 110   | 166   | 182.2 | 127.4 | 126.6 | 211.7 | 201.2 | 4834.8   | 5694.1   | 195.1 | 133   | 231.9 | 229.7 |
| MP5          | 109.5 | 102.5 | 118   | 102.5 | 188.9 | 221.9 | 129.7 | 132.7 | 204.1 | 172.8 | 4707     | 4711.8   | 131.6 | 92.5  | 201.2 | 202.6 |
| MP6          | 120.4 | 106.3 | 126.5 | 110.2 | 196.3 | 216   | 147.3 | 146.3 | 191.6 | 185.7 | 5852.7   | 6642.3   | 147.3 | 118.8 | 203.4 | 184.9 |
| MP7          | 119.8 | 98.8  | 120.3 | 95.6  | 134.1 | 146.5 | 127   | 107.8 | 187.9 | 182   | 4341.6   | 4791.9   | 142.9 | 101.8 | 187.9 | 187.9 |
| MP8          | 105.7 | 95.2  | 112.1 | 94    | 143.9 | 179.8 | 126.9 | 108.6 | 181   | 154.9 | 4670.7   | 5558.3   | 138.2 | 101.7 | 180.2 | 187.8 |
| MP9          | 107.6 | 121.7 | 97.2  | 116.9 | 166.7 | 183.1 | 141.9 | 140.4 | 139.7 | 151.8 | 6071.2   | 6116.7   | 113.2 | 129.2 | 185.4 | 213.9 |
| MP28         | 105.6 | 104.9 | 100.8 | 111   | 154.4 | 175.6 | 123   | 136   | 144.5 | 133.8 | 6119.6   | 5928.5   | 108.6 | 130.8 | 180.3 | 222.5 |

For ALP and BTA comparisons, NRSMEs are reduced in big domain, except MP28, again. When we compare increase ratio in PBIAS and decrease ratio in NRSME, PBIAS increases about 330%, whereas NRSME reduces about 11% with bigger domain. Therefore, I prefer to use smaller domain with much less PBIAS.

Related with your concern about the temporal scale, I do not think that the temporal scale is too small. If we consider that the performance of weather prediction models is getting worse after 5 days and they cannot be reliable after 7 days, 5-day simulations would be enough for time scales. If you mean that the starting day of the simulation is too early, you would be right if I used operational initial and boundary conditions. Since I use re-analysis data and this is some kind of hindcast analysis, I do not think that the results would change much. As I also discussed in the conclusion section, initial time setup of the event of interest might be an significant source of error for operational purposes, which is also out of scope for this manuscript.

Table 2. 72-hr Total Basin Averaged Precipitation Comparisons for Small and Big Domain

| MP#  | Completed Time of 72-hr storm (PST) |                      | 72-hr Total Basin Averaged Precipitation (mm) |            |
|------|-------------------------------------|----------------------|-----------------------------------------------|------------|
|      | Small Domain                        | Big Domain           | Small Domain                                  | Big Domain |
| MP1  | January 3, 1997 0000                | January 2, 1997 1700 | 480.9                                         | 424.7      |
| MP2  | January 3, 1997 0000                | January 2, 1997 1800 | 380.0                                         | 427.5      |
| MP3  | January 3, 1997 0000                | January 2, 1997 0700 | 340.3                                         | 345.44     |
| MP4  | January 3, 1997 0000                | January 2, 1997 0800 | 313.5                                         | 330.5      |
| MP5  | January 2, 1997 1600                | January 2, 1997 1000 | 362.5                                         | 403.6      |
| MP6  | January 3, 1997 0000                | January 2, 1997 1000 | 336.3                                         | 368.6      |
| MP7  | January 3, 1997 0000                | January 3, 1997 0000 | 276.5                                         | 318.5      |
| MP8  | January 3, 1997 0000                | January 2, 1997 0800 | 293.9                                         | 331.6      |
| MP9  | January 2, 1997 1500                | January 2, 1997 2000 | 346.4                                         | 349.4      |
| MP28 | January 2, 1997 1600                | January 2, 1997 2000 | 373.4                                         | 363.1      |

***“The analysis in this study is inadequate to advance our understanding in model’s physics. The manuscript lacks a conclusive assessment of the different MPs, as they behave quite diverse at different sites. The simple model-observation comparisons without any process-level diagnostics in this study fail to shed any light on the essential differences between MPs”.***

I completely agree with your comment. Topical editor, Referee #2, and Referee #3 have also similar comments. Actually I left this part for another manuscript but I can see after your comments that this part is essential. If you would agree on this, I would like to add following part, which discuss model’s physics more detail, to the final version of the manuscript.

### **Precipitable Water**

The reason of New Year’s flood is pineapple express, which is associated with a penetration of extensive amount of moisture merged in Hawaii to the West Coast of California. Precipitable water

is one of the good indicators of pineapple express which can be seen as a plume in Figure S2. Precipitable water variation in the domains of this study can be seen in Figure S3, in detail, for both NNRP Data (Left Panel) and ERA40 Data (Right Panel).

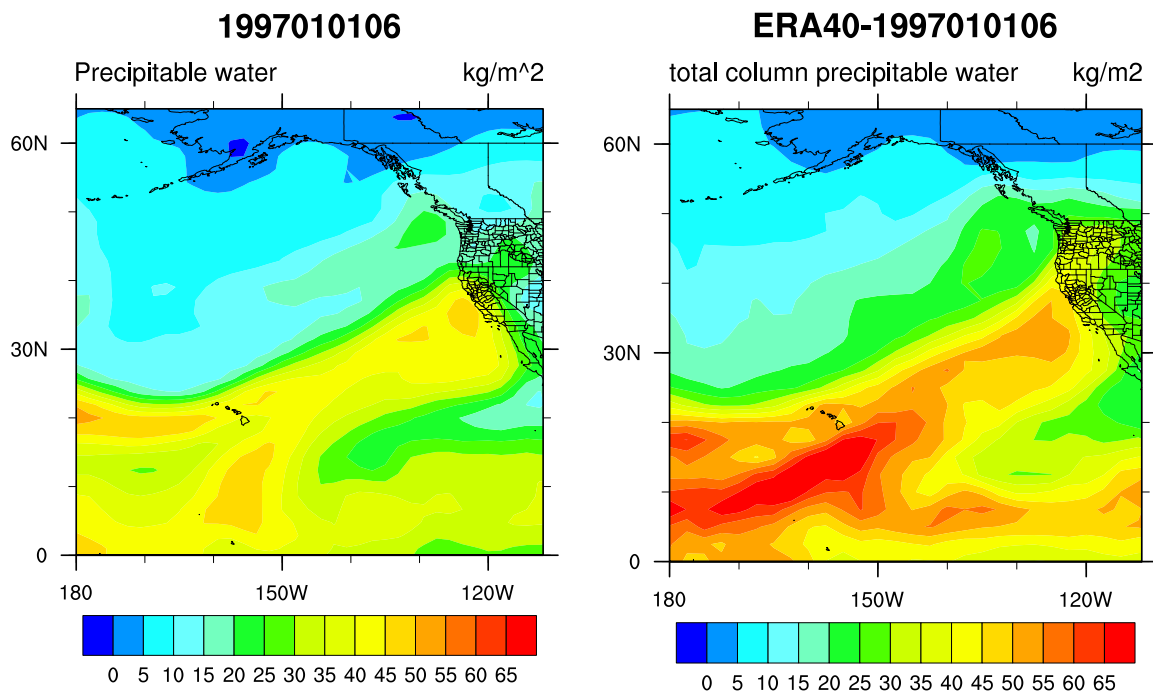

Figure S2. Pineapple express event in New Year of 1997 (Left Panel-NNRP Data; Right Panel ERA40 Data).

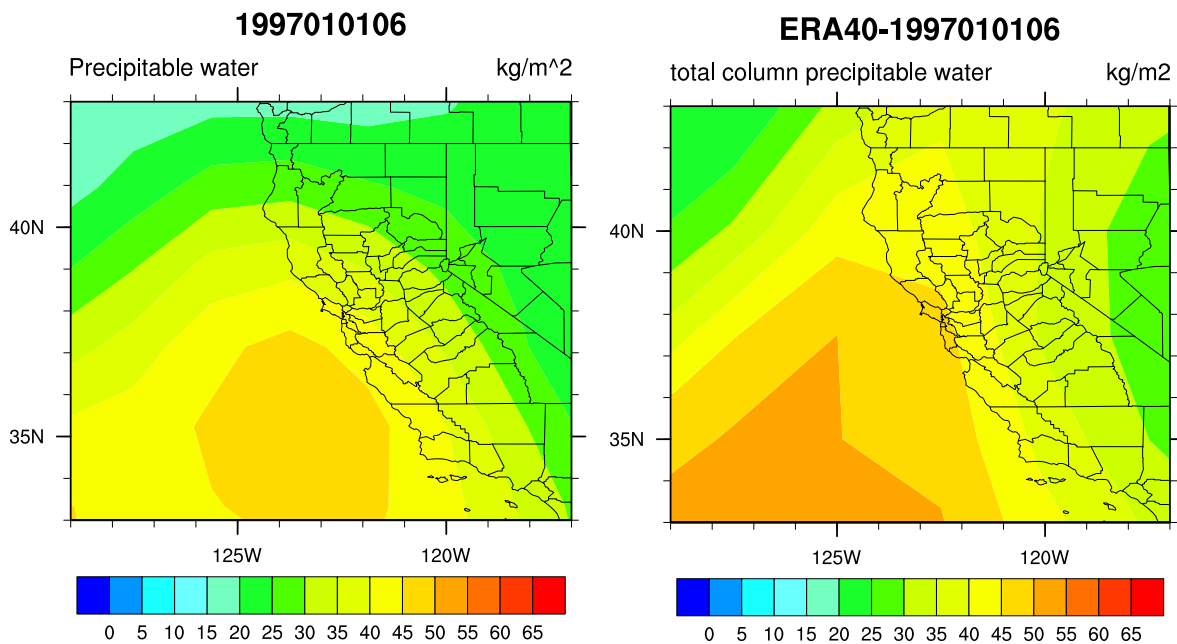

Figure S3. Precipitable Water variation in coarse WRF Domain for New Year of 1997 6am UTC (Left Panel-NNRP Data; Right Panel ERA40 Data).

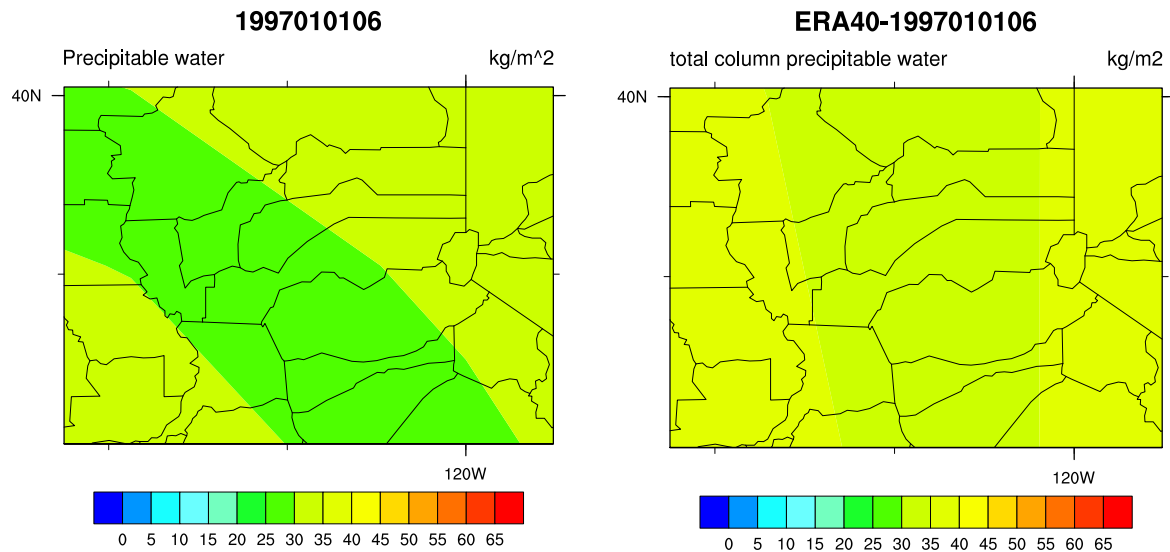

Figure S3. Precipitable Water variation in fine WRF Domain for New Year of 1997 6am UTC (Left Panel-NNRP Data; Right Panel ERA40 Data).

Figure S2 and S3 are plotted by using NCEP/NCAR Reanalysis data (Left panels), which compose the initial and boundary conditions of the WRF model simulations of this study, and ECMWF ERA-40 Reanalysis data (right panels). These figures indicate that ERA40 Data has produced about 5-10kg/kg more columnar specific humidity than that of NCEP/NCAR Reanalysis data. This difference show us the importance of utilizing initial and boundary conditions as discussed in the conclusion section.

Spatial distributions of precipitable water for each evaluated MP schemes are presented in Figure S4 on January 1st, 1997 at 6 am UTC. The reason of choosing this date is that the most intense pineapple express penetration to the land occurred on this time which is followed by the extreme precipitation events occurred following hours depending on the local forcings. Although all 19 MP scheme's distributions look alike at first glance, the detailed visual analysis may indicate the differences and also similarities in MP's which are also grouped in section 3.2 MP schemes, accordingly. It can be concluded that each MP schemes are handled moisture distribution differently in time, depending on their microphysical processes, drop size distribution, terminal velocity formulations. This may result different moisture flux convergence rates. Thus, each MP scheme has resulted various precipitation amount and their precipitation timings also vary depending on the location.

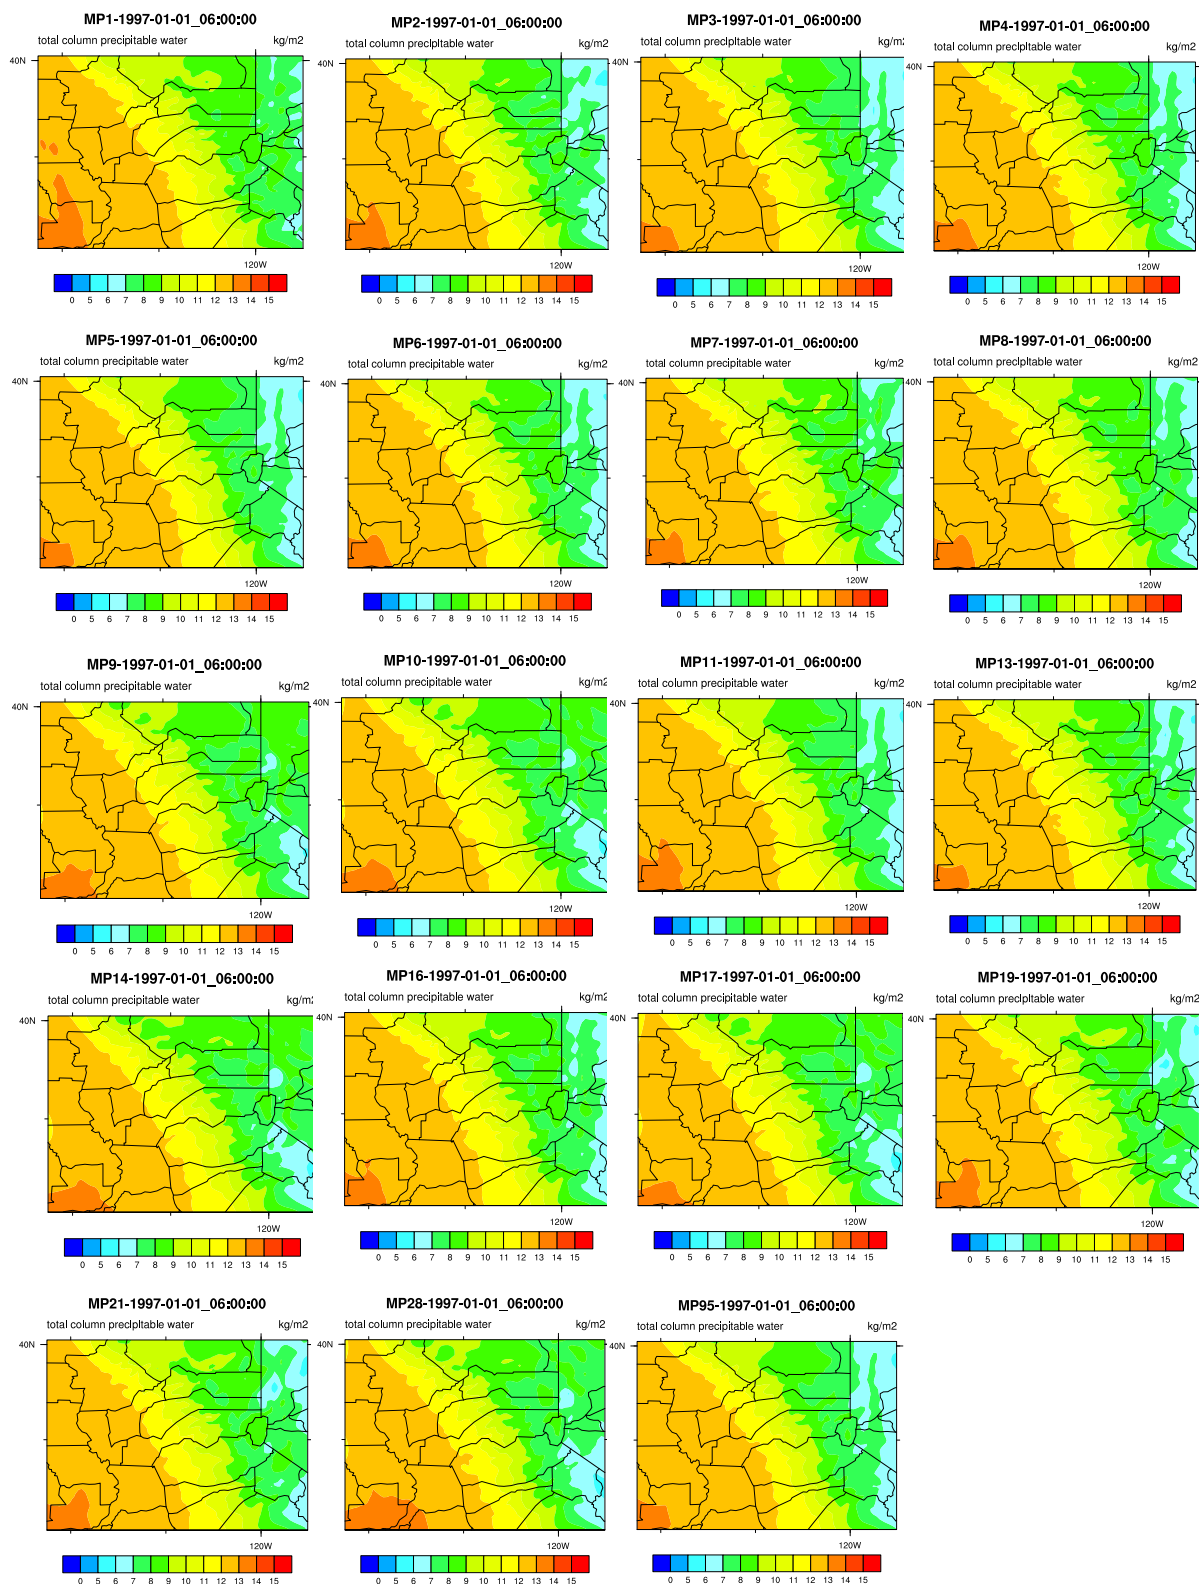

Figure S4. Precipitable water variations in 19 MP schemes on January 1st, 1997 at 6 am UTC.
